# 1 Immersive virtual reality alters selection of head-trunk coordination 2 strategies in young children

3  
4 Jenifer Miehlbradt<sup>1,2</sup>, Luigi F. Cuturi<sup>3</sup>, Silvia Zanchi<sup>3</sup>, Monica Gori<sup>3</sup>, Silvestro Micera<sup>1,4</sup>

5  
6 <sup>1</sup>Bertarelli Foundation Chair in Translational Neuroengineering, Center for Neuroprosthetics, École Polytechnique Fédérale  
7 de Lausanne, 1202 Geneva, Switzerland; <sup>2</sup>Brain Electrophysiology Attention Movement Laboratory, Institute of Psychology,  
8 University of Lausanne, 1015 Lausanne, Switzerland; <sup>3</sup>Unit for Visually Impaired People, Center for Human Technologies,  
9 Fondazione Istituto Italiano di Tecnologia, 16163 Genova, Italy; and <sup>4</sup>The BioRobotics Institute, Scuola Superiore Sant'Anna,  
10 56025 Pontedera, Italy

## 11 **Abstract**

12  
13 Developing coordinated motor control is essential for competent interactions with the  
14 surrounding world and requires a balanced multisensory integration. This integration can be  
15 challenged under altered sensory feedback, as is the case for vision in immersive virtual reality  
16 (VR). While recent works suggest that a virtual sensory environment alters visuomotor  
17 integration in healthy adults, little is known about the effects on younger individuals. Here,  
18 we assessed the development of head-trunk coordination in children aged 6 to 10 years and  
19 young adults using an immersive flight simulator and a virtual joint angle reproduction task.  
20 Contrarily to previous results, when vision was decoupled from the steering body part, only  
21 older children and adults displayed a joint ('en-bloc') head-torso operation mode. Our  
22 results reveal that immersive VR affects the coordination strategy in younger children  
23 and highlight the immaturity of postural control through the inability to implement a  
24 simplified coordination strategy. These findings have implications for pediatric  
25 applications of immersive VR, and reveal its usability as an investigation tool for  
26 sensorimotor maturation.

## 27 28 **Introduction**

29 Coordinated motor behavior and efficient integration of stimuli from different sensory  
30 modalities are necessary for successful interactions with the surrounding environment (1).  
31 The development of these abilities follows a long-lasting and elaborate process, starting  
32 long before birth and extending into early adulthood. At the motor development level, the  
33 skills are usually grouped into two categories. First, gross motor skills comprise postural  
34 control and locomotion and require the use of axial and proximal muscles. The maturation  
35 of these abilities shows a steep increase until the age of 2 years and continues to refine  
until later childhood (2–5). Conversely, fine motor skills include precise actions such as  
functional hand

36 movements, but also require multisensory integration such as hand-eye coordination. The  
37 time course of fine motor development typically extends over a more extended time period  
38 and adult patterns are generally not observed before late childhood (6,7)

39

40 The acquisition of a steady posture is a prerequisite for goal-directed behaviors such as  
41 reaching from a sitting position or locomotion (1,6). According to the ontogenetic model of  
42 postural development during childhood described by Assaiante et al., two main principles  
43 guide the selection of a given balance strategy: the choice of a stable reference, which shifts  
44 from the pelvis to the head (1,8), and the gradual mastery of the involved degrees of freedom  
45 (DOF) (1,9,10). The coordination strategy evolves from an 'en-block' behavior, which  
46 minimizes the number of DOF to be controlled (11,12) to a fully articulated strategy, where  
47 each DOF is controlled individually. Mature, multi-jointed patterns are acquired at different  
48 ages, depending on the involved joint and task characteristics. During locomotion, the 'en-  
49 block' stabilization has been observed from the acquisition of an upright stance until 6 years,  
50 while children aged 7 and older started to display a segmental control (10). Similarly, rigid  
51 forearm-trunk coupling was observed until 6 years both during voluntary trunk movements  
52 and in response to trunk perturbations (13). Instead, in a reaching task, adult head-trunk-arm  
53 coordination patterns were observed in children as young as 2-3 years old for movements in  
54 the pitch plane and from 4 years onwards in the roll and yaw planes (14). Yet, the activity and  
55 temporal recruitment of postural muscles appear to reach mature levels only after the age of  
56 11 (8). The ability to decouple head and trunk movements proves to be particularly useful  
57 when having to avoid or circumvent an obstacle while walking, where anticipatory head  
58 movements were observed from 5.5 years onwards, while younger children displayed a rigid  
59 head-trunk connection (15). Children thus first build a repertoire of postural strategies, before  
60 learning how and when to adequately implement them.

61

62 Nevertheless, successful postural stabilization does not only involve appropriate multi-jointed  
63 coordination but also requires the integration of the information provided by different  
64 sensory modalities. The Bayesian model of multisensory integration suggests that adults fuse  
65 redundant sensory inputs in a statistically optimal way by weighting the sources according to  
66 their uncertainty (16,17). The ability to combine different cues to obtain more precise  
67 estimates of one's surroundings appears late in childhood development (18,19), that is, after

68 the individual modalities have matured (20,21), unless additional feedback on the reliability  
69 of each cue is provided (22). Younger children will thus favor the information provided by the  
70 modality with the highest context-dependent reliability (19,23). In the case of postural  
71 control, children and adolescents until 15 years standing on an oscillating platform displayed  
72 better stabilization with open than with closed eyes, thus indicating a strong reliance on vision  
73 (3,24). The display of optic flow patterns to elicit automatic postural movements led to  
74 stronger responses in children and adolescents when compared to adults, and the ability to  
75 stabilize these movements improved with age until late adolescence (25). This effect was  
76 further enhanced when the participants were standing on a sway-referenced platform  
77 (26,27). When standing on the unstable platform, which attenuates the proprioceptive  
78 feedback, adults use primarily vestibular information to stabilize their posture, and this ability  
79 matures only during late adolescence (26).

80 Interestingly, children aged 7–10 years have been shown to display spatiotemporal muscle  
81 activation patterns similar to those observed in adults in response to platform oscillations  
82 (28), revealing an earlier development of automatic postural responses. Similarly, the  
83 predominance of visual cues over self-motion has been observed in children up to 11 years in  
84 a navigation task (29,30). The late maturation of visual-vestibular and visual-proprioceptive  
85 integration has been correlated with the individual development of these modalities when  
86 these are presented in conflict. While adult levels were observed as early as 3 years for  
87 proprioception and from 14 years for vision, 15-year-olds still displayed lower levels of  
88 vestibular function than adults (31).

89

90 The reliance on visual cues can be further challenged by the use of immersive VR, where the  
91 participants are immersed in a digital environment through a head-mounted display (HMD).  
92 This paradigm led to stronger sensory recalibration (32) and recruited different adaptation  
93 mechanisms (33) than non-immersive sensory alterations. Thanks to the recent development  
94 of lightweight HMDs, the use of VR has expanded to numerous applications designed for  
95 children, including neurodevelopmental research (30,34–36), neurorehabilitation (37–40), or  
96 distraction from painful medical procedures (41,42). Yet, the majority of these applications  
97 offer none or limited interactions with the virtual environment. Therefore, with the exception  
98 of two studies showing that children displayed stronger and longer-lasting responses than  
99 teenagers to prism adaptation in immersive VR (43), but generally tolerate this kind of

100 environment (44), little is known about how children integrate the visual information of the  
101 simulated world.

102

103 We previously developed a body-machine interface for the immersive control of a first-person  
104 view (FPV) flight simulator and showed that healthy adults reached a higher steering  
105 performance with this approach than with a standard joystick (45). Here, we first evaluated  
106 the ability of school-aged children to control this flight simulator using either their head or  
107 their torso, and we assessed the intersegmental coordination patterns which emerged during  
108 the execution of this task. To further investigate the underlying behaviors, we assessed the  
109 development of the head and torso proprioception during a virtual joint angle reproduction  
110 (JAR) task.

111

## 112 **Results**

### 113 Study 1

114 In the first study, the participants were equipped with a HMD through which they were  
115 immersed in a virtual scenario representing a flight on a bird's back along a path represented  
116 by a series of coins to catch (Figure 1A). The trajectory of the flight simulator was controlled  
117 either by head movements or torso movements. Continuous tracking of the head movements  
118 also enabled a dynamic adaptation of the field of view, allowing the users to look around in  
119 the virtual environment. Steering with torso movements, therefore, required decoupling of  
120 vision and steering commands, whereas these aspects were tied in the head-controlled trials.

121

#### 122 *Controlling body part and age affect steering performance*

123 We assessed the steering performance as the average distance to the center of the coins  
124 (45,46) during three phases: before and after training (*Before* and *After*, see Methods), and  
125 on the subsequent day (*Day After*). A repeated measures ANOVA revealed a significant effect  
126 of Age ( $F(4,35) = 7.45, p < 0.001, \eta_p^2 = 0.460$ ), Control ( $F(1,35) = 29.52, p < 0.001, \eta_p^2 = 0.457$ )  
127 and Phase ( $F(2,70) = 15.44, p < 0.001, \eta_p^2 = 0.306$ ), as well as significant Age:Phase ( $F(8,70) =$   
128  $4.41, p = 0.003, \eta_p^2 = 0.335$ ), Age:Control ( $F(4,35) = 5.97, p < 0.001, \eta_p^2 = 0.405$ ), Phase:Control  
129 ( $F(2,70) = 11.94, p < 0.001, \eta_p^2 = 0.254$ ) and Age:Phase:Control ( $F(8,70) = 4.21, p = 0.003, \eta_p^2$   
130  $= 0.325$ ) interactions (Figure 1C).

131

132 Post-hoc Tukey tests revealed that 6-year-olds performed better in the head- than in the torso-  
133 torso-controlled trials in all phases (*Before*:  $p = 0.002$ ,  $d = 1.17$ ; *After*:  $p = 0.009$ ,  $d = 0.83$ ; *Day*  
134 *After*:  $p < 0.001$ ,  $d = 1.17$ ). This difference was also significant for 8-year-olds *Before* ( $p < 0.001$ ,  
135  $d = 1.45$ ), but not during the other phases, although large effect sizes were observed (*After*:  
136  $p = 0.83$ ,  $d = 3.8$ ; *Day After*:  $p = 0.652$ ,  $d = 2.15$ ). Similarly, large effect sizes suggested a  
137 superiority of the head over the torso in all phases for 9- and 10-year-olds and *After* training  
138 for adults (Table S1).

139

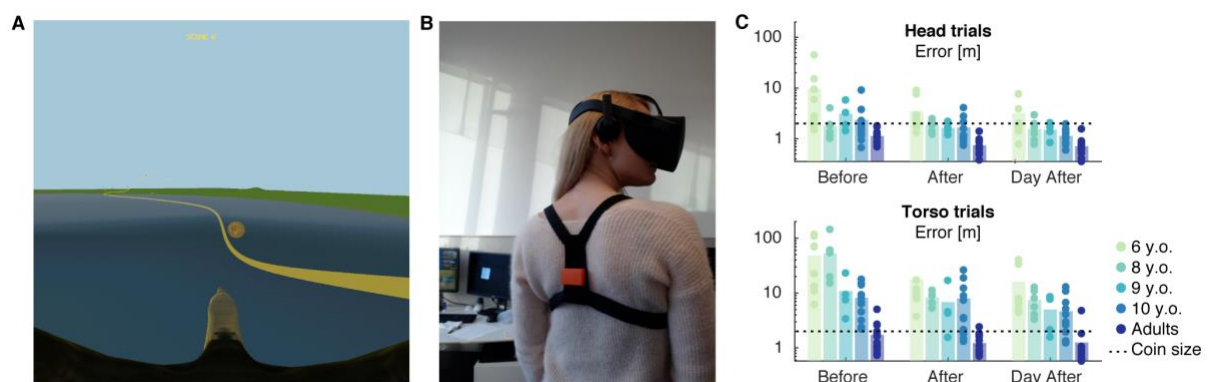

140

141 *Figure 1: Experimental setup and task performance. A Virtual environment, as seen by the participant, representing the*  
142 *coins to catch and an underlining ideal trajectory depicted by the yellow line. B Experimental apparatus worn by the*  
143 *participants, consisting of a HMD and an IMU held in place in the back by a harness. C Performance on the navigation task,*  
144 *computed as the average distance to the coin centre (error). Dots represent the average error for each individual*  
145 *participant, bars the average across participants. N = 9 (6 y.o.), 8 (8 y.o.), 4 (9 y.o.), 11 (10 y.o.), 13 (adults). See Tables S3*  
146 *and S4 for details of the statistical analyses.*

147

148 When steering with their torso, 6-year-olds performed better *After* than *Before* training ( $p =$   
149  $0.013$ ,  $d = 0.85$ ) and on the *Day After* than *Before* ( $p = 0.014$ ,  $d = 0.97$ ). The same improvement  
150 was observed in 8-year-olds between the evaluations *Before* and *After* training ( $p = 0.001$ ,  $d$   
151  $= 1.26$ ) and from *Day After* compared to *Before* training ( $p = 0.002$ ,  $d = 1.28$ ). While not  
152 reaching statistical significance, large effect sizes were observed for 9- and 10-year-olds from  
153 *Before* training to *Day After* ( $p = 0.998$ ,  $d = 0.89$ ;  $p = 0.998$ ,  $d = 0.74$  respectively). Interestingly,  
154 large effect sizes suggest that 9-year-olds and adults improved their steering precision in  
155 head-controlled trials from *Before* to *After* and *Day After* (Table S1).

156

157 In the torso-controlled trials, 6-year-olds showed significantly lower performance than 10-  
158 year-olds *Before* training ( $p = 0.023$ ,  $d = 1.34$ ) and on *Day After* ( $p = 0.02$ ,  $d = 1.07$ ) and than

159 adults in all phases (*Before*:  $p = 0.006$ ,  $d = 1.66$ ; *After*:  $p = 0.042$ ,  $d = 1.09$ ; *Day After*:  $p = 0.001$ ,  
 160  $d = 1.157$ ). Likewise, 8-year-olds performed worse than 10-year-olds and the adults *Before*  
 161 training ( $p = 0.015$ ,  $d = 1.45$  and  $p = 0.005$ ,  $d = 1.78$  respectively). In the head-controlled trials,  
 162 6-year-olds displayed higher errors than the adults *After* training ( $p = 0.001$ ,  $d = 1.55$ ), and  
 163 than 10-year-olds and the adults on *Day After* ( $p = 0.013$ ,  $d = 1.07$  and  $p = 0.002$ ,  $d = 1.52$   
 164 respectively). Non-significant differences with large effect sizes suggest a gradual  
 165 development of head-torso motor patterns, particularly between the two older children  
 166 groups and adults (Table S2).

167

168 *Segmental coordination and torso involvement differ between the torso and head trials*

169 Principal Component Analysis (PCA) applied to all the recorded trials revealed that the first  
 170 principal component (PC) accounted for 34% of the dataset's variability and separated the  
 171 head- from the torso-controlled trials ( $p < 0.001$ , Figure 2A). The kinematic variables  
 172 displaying normalized loadings  $> 0.75$  represented torso movements (Cluster 1) and head-  
 173 torso coordination (Cluster 2, see Figure 2B).

174

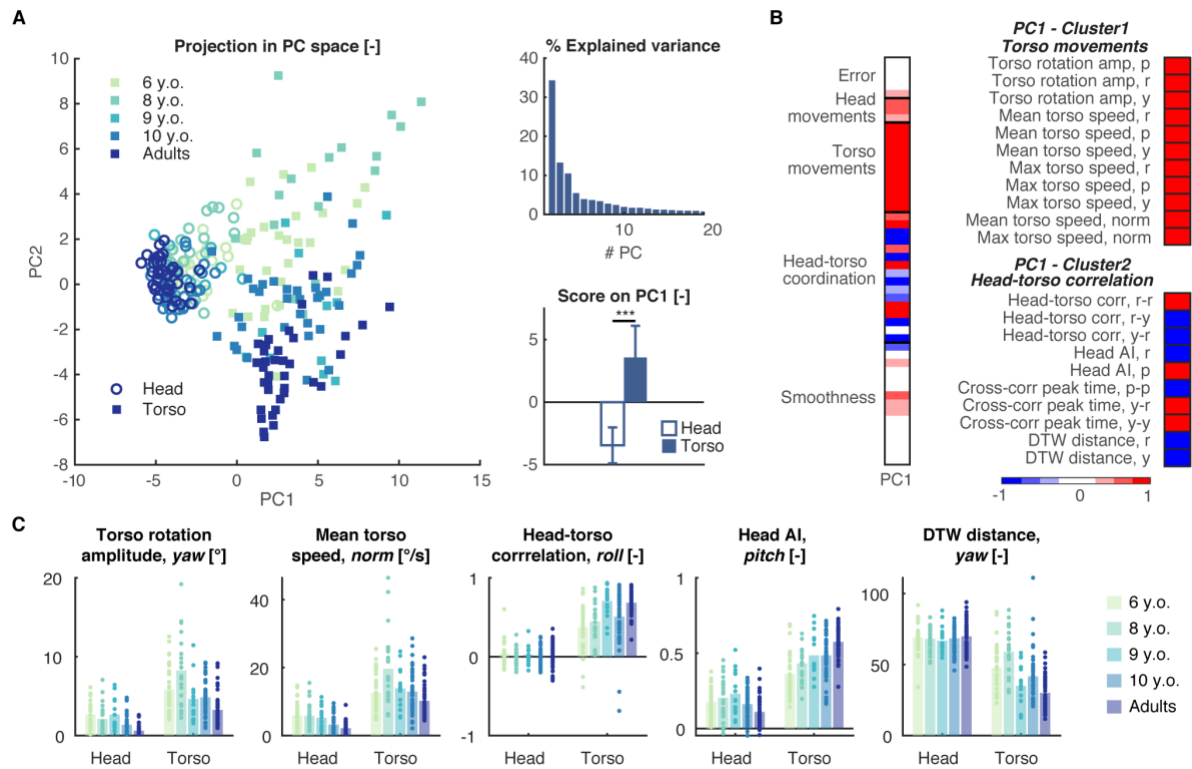

175  
 176 *Figure 2: Segmental coordination and torso involvement differ between torso and head trials. A* PCA applied to the data  
 177 *collected on all trials. The projection of the data in the space spanned by the first two PCs displays a control-based*  
 178 *separation along the first component (left) representing 34% of the overall variance (top right). This division was confirmed*  
 179 *by a t-test (bottom left, mean + SEM). B* Normalized loadings of the descriptive variables on the first PC (left) and variables

180 with absolute loadings higher than a threshold of 0.75 grouped into functional clusters. **C** Representative variables selected  
 181 from the functional clusters with significant effect of Control (see also Table S4). *B*: Before, *A*: After, *DA*: Day After

182

183 Repeated measures ANOVAs revealed a significant effect of Control on all identified variables  
 184 (Table S3). In particular, torso movements were executed with larger yaw amplitude ( $p <$   
 185  $0.001$ ,  $\eta_p^2 = 0.67$ ) and higher average velocity ( $p < 0.001$ ,  $\eta_p^2 = 0.79$ ) in the torso-controlled  
 186 trials (Figure 2C). Head movements were more similar to trunk movements in torso- than in  
 187 head-controlled trials, as assessed by the head-torso correlation in the roll plane ( $p < 0.001$ ,  
 188  $\eta_p^2 = 0.89$ ) or the dynamic time warp (DTW) distance between both segments in the yaw  
 189 plane ( $p < 0.001$ ,  $\eta_p^2 = 0.82$ ). Interestingly, the higher pitch head anchoring index (AI) in the  
 190 torso-controlled trials ( $p < 0.001$ ,  $\eta_p^2 = 0.85$ ) reveals that the head is preferentially stabilized  
 191 to the external space than to the trunk in these trials.

192

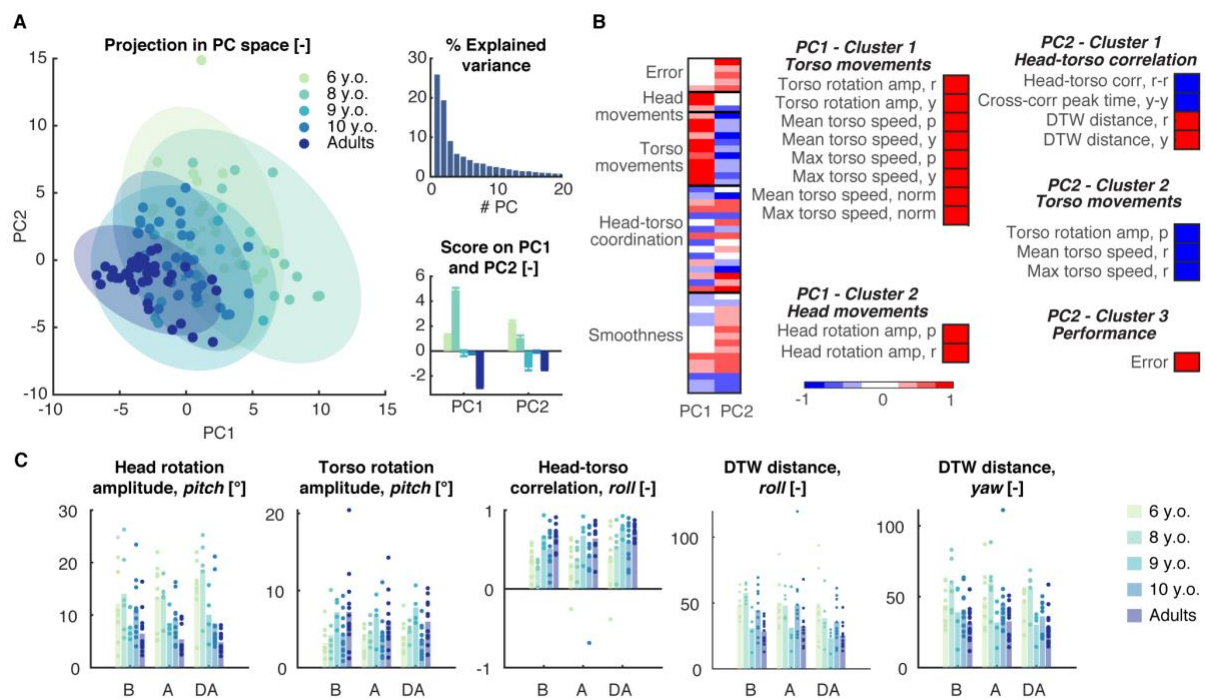

193  
 194 **Figure 3: Efficient selection of head-torso coordination strategy develops with age.** **A** PCA applied to the data collected on  
 195 torso-controlled trials. The projection of the data in the space spanned by the first two PCs displays an age-based  
 196 separation along the first two components (left) representing respectively 26% and 19% of the overall variance (top right).  
 197 Group means of the scores on the first two PCs (bottom left, mean + SEM). **B** Normalized loadings of the descriptive  
 198 variables on the first PC (left) and variables with absolute loadings higher than a threshold of 0.75 grouped into functional  
 199 clusters. **C** Representative variables selected from the functional clusters with significant effect of Age (see also Table S5). *B*:  
 200 Before, *A*: After, *DA*: Day After

201

202 *Efficient selection of head-torso coordination strategy develops with age*

203 To extract the specific variability inherent to torso steering, we repeated the procedure  
 204 described above, using only the data from the corresponding trials. On this partial dataset,  
 205 PCA revealed an age-based separation in the space spanned by the first two PCs, accounting  
 206 respectively for 25.91% and 19.38% of the total variance (Figure 3A). Individually, both PC1  
 207 and PC2 showed a decreasing trend with age (Figure 3A).

208

209 The selection of relevant descriptive variables yielded five functional clusters: Cluster 1 (PC1)  
 210 and Cluster 2 (PC2) holding variables describing the torso movements, Cluster 2 (PC1)  
 211 corresponding to head movements, Cluster 1 (PC1) characterizing head-torso correlation and  
 212 finally Cluster 3 (PC2) containing only the error (Figure 3B). All the identified variables showed  
 213 a significant effect of Age and/or Age:Phase interaction (Table S4). Younger children displayed  
 214 larger vertical head movements ( $p = 0.004$ ,  $\eta_p^2 = 0.42$ , Figure 3C) and smaller torso  
 215 movements ( $p = 0.003$ ,  $\eta_p^2 = 0.44$ ). Remarkably, the similarity between head and torso  
 216 movements augmented with age, as revealed by the increased correlation in the roll plane ( $p$   
 217  $= 0.01$ ,  $\eta_p^2 = 0.43$ ) or the DTW distance in the roll ( $p = 0.005$ ,  $\eta_p^2 = 0.39$ ) and yaw planes ( $p =$   
 218  $0.003$ ,  $\eta_p^2 = 0.44$ ).

219

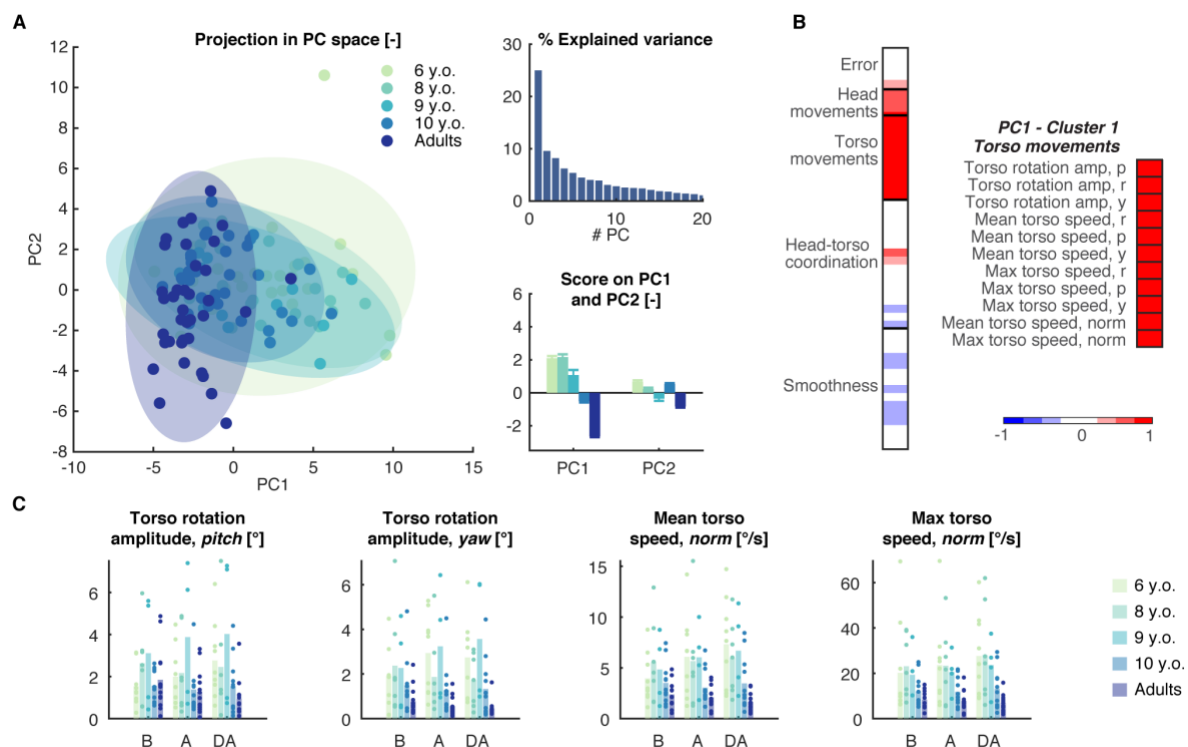

220

221 *Figure 4: Torso involvement in head-controlled trials decreases with age. A PCA applied to the data collected on head-*  
 222 *controlled trials. The projection of the data in the space spanned by the first two PCs displays an age-based separation*



223 along the first component (left) representing 25% of the overall variance (top right). Group means of the scores on the first  
224 two PCs (bottom left, mean + SEM). **B** Normalized loadings of the descriptive variables on the first PC (left) and variables  
225 with absolute loadings higher than a threshold of 0.75 grouped into functional clusters. **C** Representative variables selected  
226 from the functional clusters with significant effect of Age (see also Table S6). B: Before, A: After, DA: Day After

227

228 *Torso involvement in head-controlled trials decreases with age*

229 For head-controlled trials, PCA revealed a soft age-based separation along with the first  
230 principal component, accounting for 25% of the total variance (Figure 4A). Clustering the  
231 variables with normalized loadings larger than 0.75 yielded one single cluster describing torso  
232 movements (Figure 4B). All the identified variables showed a significant effect of Age and/or  
233 Age:Phase interaction (Table S5). The amplitude of the torso movements decreased with age  
234 in the pitch ( $p = 0.016$ ,  $\eta_p^2 = 0.31$ , Figure 4C) and yaw planes ( $p = 0.015$ ,  $\eta_p^2 = 0.32$ ), as well as  
235 the average ( $p = 0.016$ ,  $\eta_p^2 = 0.3$ ) and maximal torso velocity ( $p = 0.015$ ,  $\eta_p^2 = 0.32$ ).

236

## 237 Study 2

238 To further elucidate the mechanisms underlying the observed behavior, in particular the  
239 importance of mature and reliable proprioceptive inputs when the visual feedback is altered,  
240 we designed a second study in which the participants were immersed in a virtual landscape  
241 as previously and asked to execute a joint angle reproduction (JAR) test using their head or  
242 their torso. The JAR paradigm is an active test for proprioception that reflects the functional  
243 use of this sensory pathway and relies on kinesthetic memory (47,48), a necessary  
244 competence for the proficient use of the flight simulator tested in study 1.

245

## 246 *Error*

247 We first evaluated the angle reproduction error under three conditions: *Feedback*, where a  
248 line indicated the current position of the tested body part, *Still*, where the feedback line was  
249 removed, and *Forward*, where a constant forward speed was simulated. A repeated-  
250 measures ANOVA revealed a significant effect of Age ( $F(3,35) = 7.99$ ,  $p < 0.001$ ,  $\eta_p^2 = 0.406$ )  
251 and Control ( $F(1,35) = 21.19$ ,  $p < 0.001$ ,  $\eta_p^2 = 0.377$ ), and significant Age:Control ( $F(3,35) =$   
252  $5.24$ ,  $p = 0.004$ ,  $\eta_p^2 = 0.446$ ) and Age:Control:Condition interactions ( $F(3,35) = 3.99$ ,  $p = 0.003$   
253  $\eta_p^2 = 0.255$ ). A posthoc analysis revealed that all age groups except the 6-year-olds increased  
254 their error when using their torso compared to the head trials, overestimating their position  
255 in the former case and underestimating it in the latter (see tables S6 and S7 for details). This

256 was particularly the case in the *Forward* condition for the 8- and 10-year-olds and the adults,  
 257 and in the *Still* condition for the 10-year-olds and the adults (Figure 5A).

258

259 There was a significant effect of Age ( $F(3,35) = 9.41, p < 0.001, \eta_p^2 = 0.446$ ), Condition ( $F(2,70)$   
 260  $= 152.40, p < 0.001, \eta_p^2 = 0.813$ ) and Control ( $F(1,35) = 10.98, p = 0.002, \eta_p^2 = 0.0.239$ ) on the  
 261 variability of the error, but none of the interactions involving Age were significant. Posthoc  
 262 tests revealed that adults showed significantly less variability than 6- and 10-year-olds ( $p <$   
 263  $0.001, d = 0.92$  and  $p = 0.028, d = 0.45$  respectively, Figure 5B).

264

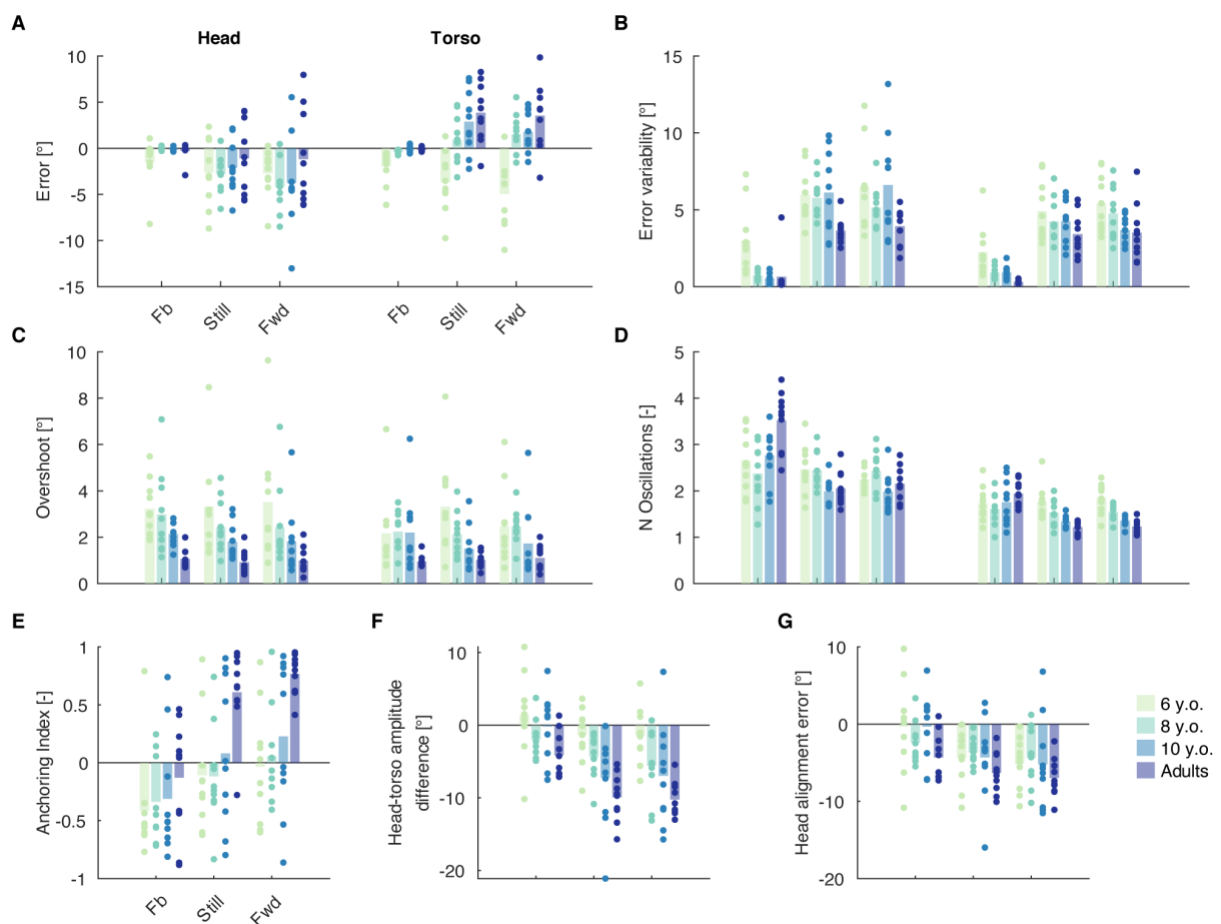

265

266 *Figure 5: Joint angle reproduction test. A-D Head and torso trials, E-G Torso trials only. A Signed error at final orientation,*  
 267 *positive values indicate final positions exceeding the target angle. B Variability (standard deviation) of the final error. C*  
 268 *Overshoot. D Number of oscillations around the final position. E Head anchoring index (AI), with AI = 1 meaning complete*  
 269 *independence of head and torso. F Difference of head and torso final orientation, negative values indicate that the head*  
 270 *orientation is smaller than the torso orientation. G Difference between final head orientation and target orientation. Dots*  
 271 *represent the average error for each individual participant, bars the average across participants. N = 10 for each age group.*  
 272 *See Tables S6 – S9 for details of the statistical analyses. FB: Feedback, Fwd: Forward, see text for description of the*  
 273 *conditions.*

274

275 *Movement strategy*

276 We next evaluated the selected movement strategy through the overshoot with respect to  
277 the final position and the number of oscillations around this angle. We found a significant  
278 effect of Age ( $F(3,35) = 5.53$   $p = 0.003$ ,  $\eta_p^2 = 0.322$ ) and Control ( $F(1,35) = 4.55$   $p = 0.04$ ,  $\eta_p^2 =$   
279  $0.115$ ) on the overshoot, with 6- and 8-year-olds exceeding their final position by a larger  
280 extent than adults ( $p = 0.03$ ,  $d = 1.40$  and  $p = 0.031$ ,  $d = 1.53$  respectively, Figure 5C).

281  
282 Assessing the number of oscillations around the final position, we found a significant effect  
283 of Condition ( $F(2,35) = 36.07$   $p < 0.001$ ,  $\eta_p^2 = 0.508$ ), and Control ( $F(1,35) = 342.80$ ,  $p < 0.001$ ,  
284  $\eta_p^2 = 0.907$ ), and Age:Condition ( $F(6,70) = 11.97$ ,  $p < 0.001$ ,  $\eta_p^2 = 0.506$ ), Age:Control ( $F(3,35)$   
285  $= 9.41$ ,  $p = 0.015$ ,  $\eta_p^2 = 0.0255$ ), and Age:Condition:Control ( $F(6,70) = 3.37$ ,  $p = 0.006$ ,  $\eta_p^2 =$   
286  $0.224$ ) interactions. Specifically, we found that adults oscillate more than all children groups  
287 when using their head and *Feedback* is provided while younger children oscillate more than  
288 older children and adults when using their torso in the *Still* and *Forward* conditions. (Figure  
289 5D, see tables S8 and S9 for details)

290

#### 291 *Head-torso coordination during torso trials*

292 We observed a significant effect of Age, Condition and Age:Condition interaction on the head  
293 anchoring index (AI). The 6- and 8-year-olds' AI was significantly lower than the adult's in the  
294 *Still* ( $p = 0.013$ ,  $d = -1.67$  and  $p = 0.019$ ,  $d = -1.85$  respectively) and *Forward* conditions ( $p =$   
295  $0.003$ ,  $d = -2.15$  and  $p = 0.012$ ,  $d = -2.14$  respectively, Figure 5E).

296

297 The angular difference between the head and torso orientations at the final position showed  
298 a significant effect of Age ( $F(3,36) = 7.29$   $p = 0.001$ ,  $\eta_p^2 = 0.378$ ) and Condition ( $F(2,72) = 36.07$   
299  $p < 0.001$ ,  $\eta_p^2 = 0.508$ ). This difference was significantly smaller for 6-year-olds than adults ( $p$   
300  $< 0.001$ ,  $d = 1.78$ , Figure 5F). Finally, there was only an effect of Condition on the alignment  
301 error of the head with the target orientation ( $F(2,72) = 18.11$   $p < 0.001$ ,  $\eta_p^2 = 0.335$ , Figure  
302 5G).

303

304

#### 305 *Effect of optical flow*

306 Interestingly, the effect of the constant optic flow implemented to generate the *Forward*  
307 condition when compared with the *Still* condition was significant only for the head AI,  
308 regardless of the age group ( $p = 0.004$ ,  $d = -0.26$ ).

309

### 310 *Prediction of performance in the flight game*

311 Eventually, we evaluated the relationship between the metrics computed during the JAR test  
312 and the performance during one torso-controlled session on the flight simulator. For the 6-  
313 year-olds, we found a significant relationship of this performance with the head-torso  
314 amplitude difference in the absence of visual feedback (*Still*:  $R^2 = 0.51$ ,  $p = 0.046$  *Forward*:  $R^2$   
315  $= 0.60$   $p = 0.024$ ), as well as with the head alignment error with *Feedback* ( $R^2 = 0.51$ ,  $p = 0.048$ ).  
316 None of the regressions were significant for the other age groups. Interestingly, we found no  
317 significant relationship between the torso JAR error and the flight performance (*Still*:  $R^2 =$   
318  $0.36$ ,  $p = 0.117$ , *Forward*:  $R^2 = 0.35$ ,  $p = 0.120$  for the 6-year-olds).

319

320

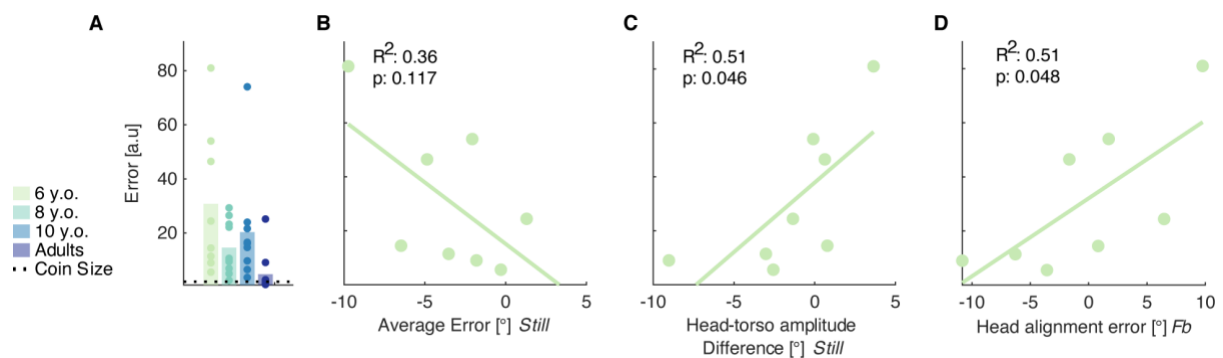

321

322 *Figure 6: Prediction of simulator steering performance from JAR test. A Simulator steering performance during a unique*  
323 *torso-controlled session. B-D Regression analysis performed using the data of the 6-year-olds, recorded during torso trials*  
324 *of the JAR test. B Signed error at final orientation (see Figure 5A). C Difference between final head orientation and target*  
325 *orientation (see Figure 5F). D Difference between final head orientation and target orientation (see Figure 5G). Dots*  
326 *represent the average error for each individual participant, bars the average across participants. N = 8 (6 y.o.), 10 ((8 y.o.),*  
327 *10 (10 y.o.), 10 (adults). FB: Feedback, see text for description of the conditions.*

328

## 329 **Discussion**

330 In this work, we investigated the development of head-torso coordination when challenged  
331 by an alteration of the visual feedback through immersive VR. We first evaluated the ability  
332 of children aged 6-10 years and young adults to steer an immersive flight simulator using  
333 either their head or their torso (Study 1), followed by a virtual JAR task to decipher the  
334 behaviors observed during the steering task (Study 2).

335

336 All the participants were able to steer the simulator using their head in study 1. However, 6-  
337 year-olds showed lower performances than the oldest children and adults, and while this  
338 difference was maintained even after practicing the task, the scores were in a comparable  
339 range. When using their torso, 6 and 8-year-olds initially struggled to control the simulator  
340 but substantially improved their performance with training. Yet, their average error remained  
341 higher than the 10-year-olds' and adults'. Overall, 6-year-olds performed worse with the torso  
342 than with the head. Kinematic data revealed a stronger involvement of the torso and a stiffer  
343 head-torso link during torso-based steering, particularly for the older age groups. Age-related  
344 differences in the torso-controlled trials were attributable to an increase of the torso  
345 movements, a decrease of the head movements and an increase in the head-torso  
346 correlation. Conversely, the age-dependent changes in the head-controlled trials were  
347 predominantly caused by a decrease of superfluous torso movements.

348

349 The virtual JAR test carried out in study 2 revealed that in the absence of explicit visual  
350 feedback, all participants except the 6-year-olds did not reach the target position with their  
351 head while exceeding it when performing the task with their torso. The younger children  
352 instead failed to reach the desired orientation with both body parts, overestimating their  
353 displacement. During the torso JAR, older children and adults decoupled their heads from  
354 their torso, maintaining the head close to the vertical during sideward trials. When explicit  
355 feedback was given on the torso position, the 6-year-olds had the tendency to overshoot the  
356 target orientation with their head. Lastly, we found that for this age group, the amplitude of  
357 unnecessary head movements during the torso JAR correlated with their performance in the  
358 torso-controlled flight game.

359

360 The comparable performances observed for all age groups in the head-controlled JAR and  
361 steering task indicate that children as young as 6 years are able to use and interact with an  
362 immersive body-machine interface both for simple and more complex tasks, in line with a  
363 recent study (44). The earlier maturation of the head control is not surprising, as this condition  
364 does not require the mastery of an articulated control of the head-trunk unit, which develops  
365 from 7 years onwards (10). However, even in this simpler experimental condition, younger  
366 children still display a higher error variability and a larger overshoot, confirming the

367 incomplete development of robust internal models as observed in standard experimental  
368 frameworks (2,49,50)

369

370 Kinematic analyses of the head-controlled trials showed that the major age-related difference  
371 could be attributed to differences in the torso movements, with rotation amplitudes and  
372 mean and maximum rotation velocities are decreasing with age. The ability to decouple head  
373 from torso movements thus develops along with childhood, confirming previous results  
374 obtained during obstacle avoidance during locomotion (1,15), where adults display  
375 anticipatory head movements (15). However, mature coordination patterns appear later with  
376 our experimental setup when compared to simple locomotion. This is in line with  
377 observations revealing that developing children tend to increase their head-body stiffness  
378 with increasing task difficulty (9), and to involve their trunk in situations where such  
379 movements are not necessarily required (51,52). In our case, the increased difficulty can be  
380 imputed to the use of immersive VR, which provides altered visual information and requires  
381 higher cognitive processing abilities to appropriately interpret the displayed environment  
382 (53,54). Here, immersive VR appears to increase the contribution of proprioceptive and  
383 vestibular inputs to postural control over vision (55).

384

385 When the control of the flight game was based on torso movements; instead, younger  
386 children struggled to use the system, even after practicing the task. Assessing the kinematics  
387 during this task and the JAR reveals an underlying twofold behavior. First, the age-related  
388 increase of the torso amplitude in the steering task and the evolution of the torso JAR error  
389 indicate that the immaturity of the torso proprioception leads younger children to  
390 overestimate their torso movements. This complements a previous study showing an increase  
391 in torso positioning accuracy with age (2). Second, the larger head movements displayed by,  
392 the younger participants during the flight game and the amplitude of their head movements  
393 during the torso JAR with visual feedback suggest that these children attempt to resolve the  
394 visual discrepancy by compensatory head movements. This is likely due to weaker reliability  
395 of the neck proprioception, which is not mature yet at this developmental stage (31,56,57).  
396 This behavioral pattern also comes in line with recent works showing biases in the perception  
397 of visual and haptic verticality to unusual body orientations in younger children (58,59), which

398 is here confirmed by the younger participant's inability to stabilize their head vertically while  
399 aligning their torso to lateral target positions.

400

401 The joint display of these two behaviors led to the unexpected observation that only the older  
402 participants favorably selected an 'en-bloc' strategy with a stiff intersegmental link during the  
403 steering task. This comes in opposition to previous studies, where such behavior was  
404 preferentially observed in younger children (1,13,15). One study found a similar behavior in  
405 adults, who displayed a head-to-torso stabilization in dimensions in which independent head  
406 movements were not beneficial (14). This is concomitant with our results, as head movements  
407 in the torso-controlled trials tended to disturb the participants' spatial orientation. Younger  
408 children instead failed to use this simpler coordination pattern, which suggests that the  
409 altered visual feedback provided by the VR setup prevented them from selecting an adequate  
410 coordination strategy, likely by reweighting the sensory contributions to posture estimation  
411 (55). This corroborates the model of postural development as a two-step process in which  
412 children first acquire a repertoire of postural strategies and later on learn how and when to  
413 select the appropriate strategy (1).

414

415

## 416 **Conclusion**

417 This study shows that young children are able to understand and to operate a body-machine  
418 interface to interact with immersive VR, but that 6- to 8-year-olds fail to successfully use such  
419 a system when decoupling of vision and steering commands is required. In such a sensory  
420 environment, these children do not resort to the simpler 'en-block' control strategy usually  
421 resorted to at a younger age in challenging conditions, but instead use a less efficient  
422 segmental control, overestimating their torso displacement and attempting to correct the  
423 visual discrepancy through head movements. This suggests that at these ages, the  
424 proprioception at the neck and torso levels is not yet mature enough to be robust to an  
425 alteration of the visual feedback, thus preventing an effective visual-vestibular-  
426 proprioceptive sensory integration, and confirms that the maturation of motor control  
427 extends beyond childhood.

428 The results of this study indicate the potential of immersive VR to characterize complex  
429 aspects of sensorimotor maturation, but that this technology should be used with care for

430 applications such as motor rehabilitation as it alters the selection of postural strategies in a  
431 developing population.

432

## 433 **Methods**

### 434 *Subjects*

435 Thirty-six typically developing children participated in the first study, grouped as follows: nine  
436 6-year-olds (5 girls), eight 8-year-olds (2 girls), four 9-year-olds (1 girl) and eleven 10-year-  
437 olds (2 girls). Two children (aged 6 and 8) asked to stop the experiment and two other ones  
438 (aged 8 and 10) did not comply with the instructions; their data were excluded from further  
439 analyses. In addition, 13 healthy adults participated in the study (3 women, age  $28.5 \pm 3.4$   
440 years). Twenty-four typically developing children participated in the second study, grouped  
441 as follows: ten 6-year-olds (7 girls), ten 8-year-olds (5 girls), and ten 10-year-olds (5 girls), as  
442 well as 10 healthy adults (4 women, age  $27.0 \pm 3.2$  years). Two 6-year-olds did not complete  
443 the session with the flight simulator, their data are reported only for the JAR task. Both studies  
444 were approved by the local ethical committees and were carried out in accordance with the  
445 Helsinki declaration. All the participants or their legal representative gave their written  
446 consent to take part in this study.

447

### 448 *Experimental setup*

449 The participants were equipped with a head-mounted display (HMD, Oculus Rift) through  
450 which they were shown the virtual environment, and an inertial measurement unit (IMU, X-  
451 sens MTw Awinda) placed in their back between the scapulae and maintained with a custom  
452 harness to acquire their trunk's 3-dimensional (3D) rotation (see Figure 1B). The IMU  
453 embedded within the HMD was used both to control the view in the virtual environment and  
454 to acquire the head rotations. The kinematic data were acquired at a sample period of 68 ms.

455

### 456 *Virtual environment and navigation task*

457 We created a virtual environment (VE) using the game engine Unity3D, which represented a  
458 FPV flight on a bird's back at a constant speed of 12 m/s, (45,46). A succession of coins to  
459 catch (distance between consecutive coins: 58m) represented a path to follow, randomly  
460 alternating simple forward motion and one of four directional maneuvers (right turn, left turn,  
461 ascent, descent). The coins' initial diameter was 1 m, and every time one coin was caught,



462 the next one was enlarged to 2 m. To minimize possible effects of path planning abilities, we  
463 additionally displayed a colored line smoothly connecting the coins, computed as a Catmull-  
464 Rom spline (60). Similarly, to provide the participants with a visual cue of their own position  
465 in space, an eagle was displayed below their visual horizon (see Figure 1A). Finally, to keep  
466 the experiment engaging, a tinkling sound was played when the coin was caught at a distance  
467 smaller than 10 m, which also added points to a total score for the trial, displayed at the top  
468 of the screen.

469

#### 470 *Control of the flight simulator*

471 The participants were asked to control the flight simulator using either head or trunk  
472 movements. Ascent and descent were achieved by flexion and extension of the controlling  
473 body part while right and left turns were computed as a linear combination of lateral flexion  
474 and axial rotation. The head and torso rotations were reset to zero before each sequence, at  
475 the participants' self-selected neutral position corresponding to a straight, forward flight.  
476 Continuous tracking of the head movements also enabled a dynamic adaptation of the field  
477 of view, allowing the users to look around in the virtual environment. Steering with torso  
478 movements, therefore, required decoupling vision and steering commands, whereas these  
479 aspects were tied in the head-controlled trials.

480

#### 481 *Joint angle reproduction (JAR) task*

482 We created a JAR task (47–49) in virtual reality using the game engine Unity 3D. The  
483 participants were immersed in a virtual landscape and were asked to align their head or their  
484 torso to one of three predefined orientations ( $0^\circ$  and  $\pm 15^\circ$ ) indicated by a pink line. We  
485 tested three conditions: *Feedback*, where a blue line showed the current orientation of the  
486 controlling body part, *Still*: where the additional visual feedback was removed and *Forward*,  
487 where a constant forward speed was simulated. The duration of one trial was set to 4 s, and  
488 the participants were asked to hold their final position until the next trial.

489

#### 490 *Experimental protocol study 1*

491 Upon arriving, the participants were shown the movements to control the simulator using the  
492 head or the torso. They were equipped with the HMD and the IMU, and were seated on a  
493 stool or on a chair and asked not to lean against the backrest. The participants were randomly

494 allocated to start the experiment using the head or the torso, using adaptive covariate  
495 randomization with the gender as covariate (61). For the torso-controlled trials, the  
496 participants were advised to keep their neck rigid as to move their entire upper body as a  
497 whole. Similarly, before starting the head-controlled trials, the experimenter made the  
498 participants aware that moving their trunk was unnecessary.

499 The recording sessions took place on two consecutive days. On day 1, the participants had to  
500 steer the simulator along four paths with each body part. The first sequence contained 26  
501 coins and was an initial evaluation of the performance (hereafter: *Before*). The second and  
502 third sequences each contained 50 coins; these sequences were considered as training. The  
503 fourth sequence contained 18 coins (hereafter: *After*). All the sequences controlled with a  
504 given body part were executed successively. On day 2, one sequence containing 26 coins had  
505 to be performed with each body part (hereafter: *Day After*). Breaks were allowed between  
506 the sequences, at the participants' demand.

507

#### 508 *Experimental protocol study 2*

509 The participants were equipped and seated as previously and were shown the JAR  
510 movements by the experimenter. The conditions were tested in the following order:  
511 *Feedback, Still, Forward*, while the participants were randomly allocated to start either with  
512 the head or the torso, using covariate adaptive randomization with the gender as covariate  
513 (61). The orientations were presented in a randomized order, totalling 5 repetitions for each  
514 orientation in the *Feedback* condition and 10 repetitions for the *Still* and *Forward* conditions.  
515 At the end of the session, the participants executed one flight sequence with the simulator  
516 (*Before* session described above).

517

#### 518 *Data processing*

519 The kinematic data acquired in study 1 was divided into segments corresponding to the  
520 intervals between consecutive coins. Descriptive variables were computed on these segments  
521 and averaged over each entire sequence (see Table 1). Principal component analysis (PCA)  
522 was applied to the dataset containing the kinematic variables extracted from all trials, or from  
523 the head- and torso-controlled trials, respectively. Outliers were detected as data points  
524 whose Euclidean distance to the centroid of the z-scored dataset deviated from the average  
525 value by more than 4 standard deviations. These points were given a weight of 0.5 in the PCA

526 computation. The variables with normalized loadings  $> 0.75$  on the first (all trials, head-  
527 controlled trials) or the first two principal components (torso trials) were considered as  
528 significant and were regrouped into functional clusters.

529

530 The data acquired during study 2 was separated into individual trials, and the final position  
531 was averaged over the last 1.5 s of each trial. For each trial, we computed the signed error  
532 with respect to the target orientation, the overshoot, the number of oscillations around the  
533 final angle, and for the trials involving the torso, the head anchoring index (AI, computed over  
534 the entire trial), the final angular difference of the head and the torso and the head alignment  
535 “error” as the difference between the final head angle and the target orientation.

536

### 537 *Statistical analysis*

538 The statistical evaluations were performed using paired t-tests or repeated-measures  
539 ANOVA, using the age as a between-subjects factor and the control type and/or experimental  
540 phase as within-subject factors using custom Matlab routines (62). The p-values were  
541 corrected using the Greenhouse-Geisser correction when Mauchly’s test indicated a violation  
542 of sphericity. Post hoc analyses were conducted using Tukey’s honest significant differences  
543 test, with a significance level of .05 for all tests.

544

### 545 **Acknowledgments**

546 We thank Stefania Saviotti, Elisa Freddi and Davide Esposito for their help in the data  
547 collection. This work was supported by the Bertarelli Foundation.

548

549

### 550 **References**

- 551 1. Assaiante C, Mallau S, Viel S, Jover M, Schmitz C. Development of Postural Control in  
552 Healthy Children: A Functional Approach. *Neural Plast.* 2005;12(2–3):109–18.
- 553 2. Ashton-Miller JA, McGlashen KM, Schultz AB. Trunk positioning accuracy in children  
554 7-18 years old. *J Orthop Res.* 1992 Mar 1;10(2):217–25.
- 555 3. Mallau S, Vaugoyeau M, Assaiante C. Postural Strategies and Sensory Integration: No  
556 Turning Point between Childhood and Adolescence. *PLOS ONE.* 2010 Sep 29;5(9):e13078.
- 557 4. Onis M de. WHO Motor Development Study: Windows of achievement for six gross  
558 motor development milestones. *Acta Paediatr.* 2006;95(S450):86–95.
- 559 5. Yeo SS, Jang SH, Son SM. The different maturation of the corticospinal tract and  
560 corticoreticular pathway in normal brain development: diffusion tensor imaging study. *Front*  
561 *Hum Neurosci* [Internet]. 2014 Aug 4 [cited 2018 Nov 15];8. Available from:  
562 <https://www.ncbi.nlm.nih.gov/pmc/articles/PMC4163649/>
- 563 6. Adolph KE, Franchak JM. The development of motor behavior. *Wiley Interdiscip Rev*

- 564 Cogn Sci [Internet]. 2017 Jan [cited 2018 Dec 27];8(1–2). Available from:  
565 <https://www.ncbi.nlm.nih.gov/pmc/articles/PMC5182199/>
- 566 7. Simon-Martinez C, Santos GL dos, Jaspers E, Vanderschueren R, Mailleux L, Klingels  
567 K, et al. Age-related changes in upper limb motion during typical development. PLOS ONE.  
568 2018 Jun 6;13(6):e0198524.
  - 569 8. van der Heide JC, Otten B, van Eykern LA, Hadders-Algra M. Development of postural  
570 adjustments during reaching in sitting children. Exp Brain Res. 2003 Jul;151(1):32–45.
  - 571 9. Assaiante C, Amblard B. Ontogenesis of head stabilization in space during  
572 locomotion in children: influence of visual cues. Exp Brain Res. 1993;93(3):499–515.
  - 573 10. Assaiante C, Amblard B. An ontogenetic model for the sensorimotor organization of  
574 balance control in humans. Hum Mov Sci. 1995 Jun 1;14(1):13–43.
  - 575 11. Bernstein NA. The co-ordination and regulation of movements. Oxford: Pergamon  
576 Press; 1967. 226 p.
  - 577 12. Sporns O, Edelman GM. Solving Bernstein’s Problem: A Proposal for the  
578 Development of Coordinated Movement by Selection. Child Dev. 1993;64(4):960–81.
  - 579 13. Roncesvalles MN, Schmitz C, Zedka M, Assaiante C, Woollacott M. From egocentric  
580 to exocentric spatial orientation: development of posture control in bimanual and trunk  
581 inclination tasks. J Mot Behav. 2005 Sep;37(5):404–16.
  - 582 14. Sveistrup H, Schneiberg S, McKinley PA, McFadyen BJ, Levin MF. Head, arm and  
583 trunk coordination during reaching in children. Exp Brain Res. 2008 Jun 1;188(2):237–47.
  - 584 15. Grasso R, Assaiante C, Prévost P, Berthoz A. Development of Anticipatory Orienting  
585 Strategies During Locomotor Tasks in Children. Neurosci Biobehav Rev. 1998 Mar  
586 4;22(4):533–9.
  - 587 16. Chambers C, Sokhey T, Gaebler-Spira D, Kording KP. The integration of probabilistic  
588 information during sensorimotor estimation is unimpaired in children with Cerebral Palsy.  
589 PLoS ONE [Internet]. 2017 Nov 29 [cited 2019 Jan 10];12(11). Available from:  
590 <https://www.ncbi.nlm.nih.gov/pmc/articles/PMC5706703/>
  - 591 17. Ernst MO, Banks MS. Humans integrate visual and haptic information in a statistically  
592 optimal fashion. Nature. 2002 Jan 24;415(6870):429–33.
  - 593 18. Chambers C, Sokhey T, Gaebler-Spira D, Kording KP. The development of Bayesian  
594 integration in sensorimotor estimation. J Vis [Internet]. 2018 Nov 15 [cited 2019 Jan  
595 10];18(12). Available from: <https://www.ncbi.nlm.nih.gov/pmc/articles/PMC6241171/>
  - 596 19. Gori M, Del Viva M, Sandini G, Burr DC. Young Children Do Not Integrate Visual and  
597 Haptic Form Information. Curr Biol. 2008 May 6;18(9):694–8.
  - 598 20. Burr D, Gori M. Multisensory Integration Develops Late in Humans. In: Murray MM,  
599 Wallace MT, editors. The Neural Bases of Multisensory Processes. Boca Raton (FL): CRC  
600 Press/Taylor & Francis; 2012. (Frontiers in Neuroscience).
  - 601 21. Contreras-Vidal JL. Development of forward models for hand localization and  
602 movement control in 6- to 10-year-old children. Hum Mov Sci. 2006 Oct 1;25(4):634–45.
  - 603 22. Negen J, Chere B, Bird L, Taylor E, Roome HE, Keenaghan S, et al. Sensory Cue  
604 Combination in Children Under 10 Years of Age. bioRxiv. 2018 Dec 20;501585.
  - 605 23. Nardini M, Dekker T, Petrini K. Crossmodal integration: a glimpse into the  
606 development of sensory remapping. Curr Biol CB. 2014 Jun 2;24(11):R532-534.
  - 607 24. Viel S, Vaugoyeau M, Assaiante C. Adolescence: a transient period of proprioceptive  
608 neglect in sensory integration of postural control. Motor Control. 2009 Jan;13(1):25–42.
  - 609 25. Greffou S, Bertone A, Hanssens J-M, Faubert J. Development of visually driven  
610 postural reactivity: A fully immersive virtual reality study. J Vis. 2008 Aug 5;8(11):15–15.

- 611 26. Gouleme N, Ezane MD, Wiener-Vacher S, Bucci MP. Spatial and temporal postural  
612 analysis: a developmental study in healthy children. *Int J Dev Neurosci*. 2014 Nov 1;38:169–  
613 77.
- 614 27. Sparto PJ, Redfern MS, Jasko JG, Casselbrant ML, Mandel EM, Furman JM. The  
615 influence of dynamic visual cues for postural control in children aged 7-12 years. *Exp Brain*  
616 *Res*. 2006 Jan;168(4):505–16.
- 617 28. Shumway-Cook A, Woollacott MH. The Growth of Stability. *J Mot Behav*. 1985 Jun  
618 1;17(2):131–47.
- 619 29. Nardini M, Jones P, Bedford R, Braddick O. Development of Cue Integration in  
620 Human Navigation. *Curr Biol*. 2008 May 6;18(9):689–93.
- 621 30. Petrini K, Caradonna A, Foster C, Burgess N, Nardini M. How vision and self-motion  
622 combine or compete during path reproduction changes with age. *Sci Rep*. 2016 Jul  
623 6;6:29163.
- 624 31. Hirabayashi S, Iwasaki Y. Developmental perspective of sensory organization on  
625 postural control. *Brain Dev*. 1995 Mar 1;17(2):111–3.
- 626 32. Ramos AA, Hørning EC, Wilms IL. Simulated prism exposure in immersed virtual  
627 reality produces larger prismatic after-effects than standard prism exposure in healthy  
628 subjects. *PLOS ONE*. 2019 May 24;14(5):e0217074.
- 629 33. Anglin JM, Sugiyama T, Liew S-L. Visuomotor adaptation in head-mounted virtual  
630 reality versus conventional training. *Sci Rep*. 2017 Apr 4;7:45469.
- 631 34. Cowie D, McKenna A, Bremner AJ, Aspell JE. The development of bodily self-  
632 consciousness: changing responses to the Full Body Illusion in childhood. *Dev Sci*.  
633 2018;21(3):e12557.
- 634 35. Morrongiello BA, Corbett M, Milanovic M, Beer J. Using a Virtual Environment to  
635 Examine How Children Cross Streets: Advancing Our Understanding of How Injury Risk  
636 Arises. *J Pediatr Psychol*. 2016 Mar 1;41(2):265–75.
- 637 36. Segovia KY, Bailenson JN. Virtually True: Children’s Acquisition of False Memories in  
638 Virtual Reality. *Media Psychol*. 2009 Nov 23;12(4):371–93.
- 639 37. Biffi E, Beretta E, Cesareo A, Maghini C, Turconi AC, Reni G, et al. An Immersive  
640 Virtual Reality Platform to Enhance Walking Ability of Children with Acquired Brain Injuries.  
641 *Methods Inf Med*. 2017 Mar 23;56(2):119–26.
- 642 38. Bortone I, Leonardis D, Mastronicola N, Crecchi A, Bonfiglio L, Procopio C, et al.  
643 Wearable Haptics and Immersive Virtual Reality Rehabilitation Training in Children With  
644 Neuromotor Impairments. *IEEE Trans Neural Syst Rehabil Eng*. 2018 Jul;26(7):1469–78.
- 645 39. de Mello Monteiro CB, Masetti T, da Silva TD, van der Kamp J, de Abreu LC, Leone C,  
646 et al. Transfer of motor learning from virtual to natural environments in individuals with  
647 cerebral palsy. *Res Dev Disabil*. 2014 Oct 1;35(10):2430–7.
- 648 40. Gagliardi C, Turconi AC, Biffi E, Maghini C, Marelli A, Cesareo A, et al. Immersive  
649 Virtual Reality to Improve Walking Abilities in Cerebral Palsy: A Pilot Study. *Ann Biomed Eng*.  
650 2018 Sep;46(9):1376–84.
- 651 41. Sharar SR, Carrougher GJ, Nakamura D, Hoffman HG, Blough DK, Patterson DR.  
652 Factors Influencing the Efficacy of Virtual Reality Distraction Analgesia During Postburn  
653 Physical Therapy: Preliminary Results from 3 Ongoing Studies. *Arch Phys Med Rehabil*. 2007  
654 Dec 1;88(12, Supplement 2):S43–9.
- 655 42. Won AS, Bailey J, Bailenson J, Tataru C, Yoon IA, Golianu B. Immersive Virtual Reality  
656 for Pediatric Pain. *Children* [Internet]. 2017 Jun 23 [cited 2019 Jan 1];4(7). Available from:  
657 <https://www.ncbi.nlm.nih.gov/pmc/articles/PMC5532544/>

- 658 43. Adams H, Narasimham G, Rieser J, Creem-Regehr S, Stefanucci J, Bodenheimer B.  
659 Locomotive Recalibration and Prism Adaptation of Children and Teens in Immersive Virtual  
660 Environments. *IEEE Trans Vis Comput Graph*. 2018 Apr;24(4):1408–17.
- 661 44. Tyachsen L, Foeller P. Effects of Immersive Virtual Reality Headset Viewing on Young  
662 Children: Visuomotor Function, Postural Stability, and Motion Sickness. *Am J Ophthalmol*.  
663 2020;209:151–9.
- 664 45. Miehlabradt J, Cherpillod A, Mintchev S, Coscia M, Artoni F, Floreano D, et al. Data-  
665 driven body-machine interface for the accurate control of drones. *Proc Natl Acad Sci*. 2018  
666 Jul 31;115(31):7913–8.
- 667 46. Cherpillod A, Floreano D, Mintchev S. Embodied Flight with a Drone. In: 2019 Third  
668 IEEE International Conference on Robotic Computing (IRC). 2019. p. 386–90.
- 669 47. Hillier S, Immink M, Thewlis D. Assessing Proprioception: A Systematic Review of  
670 Possibilities. *Neurorehabil Neural Repair*. 2015 Nov 1;29(10):933–49.
- 671 48. Goble DJ. Proprioceptive Acuity Assessment Via Joint Position Matching: From Basic  
672 Science to General Practice. *Phys Ther*. 2010 Aug 1;90(8):1176–84.
- 673 49. Goble DJ, Lewis CA, Hurvitz EA, Brown SH. Development of upper limb  
674 proprioceptive accuracy in children and adolescents. *Hum Mov Sci*. 2005 Apr;24(2):155–70.
- 675 50. Sigmundsson H, Whiting HTA, Loftesnes JM. Development of proprioceptive  
676 sensitivity. *Exp Brain Res*. 2000 Dec 1;135(3):348–52.
- 677 51. Schneiberg S, Sveistrup H, McFadyen B, McKinley P, Levin MF. The development of  
678 coordination for reach-to-grasp movements in children. *Exp Brain Res*. 2002  
679 Sep;146(2):142–54.
- 680 52. Peeters LHC, Kingma I, Faber GS, Dieën JH van, Groot IJM de. Trunk, head and pelvis  
681 interactions in healthy children when performing seated daily arm tasks. *Exp Brain Res*.  
682 2018 Jul 1;236(7):2023–36.
- 683 53. Baumgartner T, Speck D, Wettstein D, Masnari O, Beeli G, Jäncke L. Feeling present  
684 in arousing virtual reality worlds: prefrontal brain regions differentially orchestrate presence  
685 experience in adults and children. *Front Hum Neurosci*. 2008;2:8.
- 686 54. Jäncke L, Cheetham M, Baumgartner T. Virtual reality and the role of the prefrontal  
687 cortex in adults and children. *Front Neurosci*. 2009;3:6.
- 688 55. Akizuki H, Uno A, Arai K, Morioka S, Ohyama S, Nishiike S, et al. Effects of immersion  
689 in virtual reality on postural control. *Neurosci Lett*. 2005 Apr 29;379(1):23–6.
- 690 56. Mergner T, Siebold C, Schweigart G, Becker W. Human perception of horizontal trunk  
691 and head rotation in space during vestibular and neck stimulation. *Exp Brain Res*.  
692 1991;85(2):389–404.
- 693 57. Pettorossi VE, Schieppati M. Neck Proprioception Shapes Body Orientation and  
694 Perception of Motion. *Front Hum Neurosci*. 2014 Nov 4;8:895.
- 695 58. Cuturi LF, Gori M. The Effect of Visual Experience on Perceived Haptic Verticality  
696 When Tilted in the Roll Plane. *Front Neurosci*. 2017 Dec 6;11:687.
- 697 59. Cuturi LF, Gori M. Biases in the Visual and Haptic Subjective Vertical Reveal the Role  
698 of Proprioceptive/Vestibular Priors in Child Development. *Front Neurol [Internet]*. 2019  
699 [cited 2019 Sep 4];9. Available from:  
700 <https://www.frontiersin.org/articles/10.3389/fneur.2018.01151/full#h9>
- 701 60. Catmull E, Rom R. A Class of Local Interpolating Splines. In: *Computer Aided*  
702 *Geometric Design*. New York: Academic Press; 1974. p. 317–26.
- 703 61. Frane JW. A Method of Biased Coin Randomization, its Implementation, and its  
704 Validation. *Drug Inf J*. 1998 Apr 1;32(2):423–32.

- 705 62. Caplette L. Simple RM/Mixed ANOVA for any design [Internet]. MATLAB Central File  
706 Exchange. [cited 2020 Aug 6]. Available from:  
707 [https://www.mathworks.com/matlabcentral/fileexchange/64980-simple-rm-mixed-anova-](https://www.mathworks.com/matlabcentral/fileexchange/64980-simple-rm-mixed-anova-for-any-design)  
708 [for-any-design](https://www.mathworks.com/matlabcentral/fileexchange/64980-simple-rm-mixed-anova-for-any-design)
- 709 63. Berndt DJ, Clifford J. Using dynamic time warping to find patterns in time series. In  
710 Seattle, WA: AAAI; 1994. p. 359–70. Available from:  
711 <https://www.aaai.org/Papers/Workshops/1994/WS-94-03/WS94-03-031.pdf>
- 712 64. ten Holt GA, Reinders MJT, Hendriks EA. Multi-Dimensional Dynamic Time Warping  
713 for Gesture Recognition. In 2007.
- 714 65. Balasubramanian S, Melendez-Calderon A, Burdet E. A Robust and Sensitive Metric  
715 for Quantifying Movement Smoothness. *IEEE Trans Biomed Eng.* 2012 Aug;59(8):2126–36.
- 716 66. Gulde P, Hermsdörfer J. Smoothness Metrics in Complex Movement Tasks. *Front*  
717 *Neurol* [Internet]. 2018 [cited 2018 Dec 27];9. Available from:  
718 <https://www.frontiersin.org/articles/10.3389/fneur.2018.00615/full#B21>
- 719 67. Rohrer B, Fasoli S, Krebs HI, Hughes R, Volpe B, Frontera WR, et al. Movement  
720 Smoothness Changes during Stroke Recovery. *J Neurosci.* 2002 Sep 15;22(18):8297–304.
- 721 68. Dipietro L, Krebs HI, Volpe BT, Stein J, Bever C, Mernoff ST, et al. Learning, Not  
722 Adaptation, Characterizes Stroke Motor Recovery: Evidence From Kinematic Changes  
723 Induced by Robot-Assisted Therapy in Trained and Untrained Task in the Same Workspace.  
724 *IEEE Trans Neural Syst Rehabil Eng.* 2012 Jan;20(1):48–57.  
725

726

| #                              | Variable                                  | Details                                                                                                                                                                                                                                                                                                                                                                                                                            |
|--------------------------------|-------------------------------------------|------------------------------------------------------------------------------------------------------------------------------------------------------------------------------------------------------------------------------------------------------------------------------------------------------------------------------------------------------------------------------------------------------------------------------------|
| <b>Steering performance</b>    |                                           |                                                                                                                                                                                                                                                                                                                                                                                                                                    |
| 1-3                            | Error [m]                                 | Unsigned distance to the coin center, computed when the participant crossed the vertical plane perpendicular to the trajectory supporting the coin.                                                                                                                                                                                                                                                                                |
| 4                              | Path ratio [-]                            | Quotient of the travelled path and an ideal path computed as a Catmull-Rom interpolation between the coins. Computed for the entire sequence.                                                                                                                                                                                                                                                                                      |
| 5                              | Time [s]                                  | Duration of the interval between two consecutive coins.                                                                                                                                                                                                                                                                                                                                                                            |
| <b>Head movements</b>          |                                           |                                                                                                                                                                                                                                                                                                                                                                                                                                    |
| 6-8                            | Head rotation amplitude [°]               | Interquartile range.<br><i>Pitch, roll, yaw</i>                                                                                                                                                                                                                                                                                                                                                                                    |
| <b>Torso movements</b>         |                                           |                                                                                                                                                                                                                                                                                                                                                                                                                                    |
| 9-11                           | Torso rotation amplitude [°]              | Interquartile range.<br><i>Pitch, roll, yaw</i>                                                                                                                                                                                                                                                                                                                                                                                    |
| 12-14,18                       | Mean torso speed [°]                      | Angular velocity.<br><i>Pitch, roll, yaw, norm</i>                                                                                                                                                                                                                                                                                                                                                                                 |
| 15-17, 19                      | Maximum torso speed [°]                   | Angular velocity.<br><i>Pitch, roll, yaw, norm</i>                                                                                                                                                                                                                                                                                                                                                                                 |
| <b>Head-torso coordination</b> |                                           |                                                                                                                                                                                                                                                                                                                                                                                                                                    |
| 20-24                          | Head-torso correlation                    | Absolute correlation.<br><i>Pitch-pitch, roll-roll, yaw-yaw, roll-yaw, yaw-roll</i>                                                                                                                                                                                                                                                                                                                                                |
| 25-27                          | Head anchoring index (AI)                 | Computed as $\Delta\sigma = \frac{\sigma_r - \sigma_a}{\sigma_r + \sigma_a}$ , where $\sigma_a$ is the standard deviation of the absolute head angles and $\sigma_r$ the standard deviation of the head angles relative to the torso. Positive $\Delta\sigma$ values indicate a preferred head stabilization to the external space and negative values a better head stabilization to the torso (9,14).<br><i>Pitch, roll, yaw</i> |
| 28-32                          | Peak time of head-torso cross-correlation | Occurrence of the peak in cross-correlation. Negative delays indicate that the head is moving ahead of the body.<br><i>Pitch-pitch, roll-roll, yaw-yaw, roll-yaw, yaw-roll</i>                                                                                                                                                                                                                                                     |
| 33-35                          | DTW distance                              | Dynamic time warping (DTW) distance between the head and torso sequences. Both segments were linearly interpolated to keep the number of data points constant across sequences (63,64).<br><i>Pitch, roll, yaw</i>                                                                                                                                                                                                                 |
| <b>Movement smoothness</b>     |                                           |                                                                                                                                                                                                                                                                                                                                                                                                                                    |
| 36-38                          | Torso SAL                                 | 3-dimensional smoothness metric based on the arc length of the movement speed profile's normalized Fourier magnitude spectrum; higher absolute values relate to jerkier movements(65)                                                                                                                                                                                                                                              |
| 39-41                          | Number of peaks head                      | Time-normalized number of peaks (66).<br><i>Pitch, roll, yaw</i>                                                                                                                                                                                                                                                                                                                                                                   |
| 42-44                          | Number of peaks torso                     | Time-normalized number of peaks (66).<br><i>Pitch, roll, yaw</i>                                                                                                                                                                                                                                                                                                                                                                   |
| 45-47                          | Number of peaks bird                      | Time-normalized number of peaks (66).<br><i>Pitch, roll, yaw</i>                                                                                                                                                                                                                                                                                                                                                                   |
| 48-50                          | Torso speed ratio [-]                     | Ratio of the mean to the maximum velocities; a ratio close to 1 stands for smooth movements, while lower values indicate jerkier movements (67,68).<br><i>Pitch, roll, yaw</i>                                                                                                                                                                                                                                                     |

727

Table 1: Descriptive kinematic variables.
